# Supplementary material for: Tinnitus is associated with reduced sound level tolerance in adolescents with normal audiograms and otoacoustic emissions
Source: PubMed Central journal article supplement (PMC4893619; doi:10.1038/srep27109), 2016-06-06
Supplement: srep27109-s1.pdf [file srep27109-s1.pdf]

# Tinnitus is associated with reduced sound level tolerance in adolescents with normal audiograms and otoacoustic emissions

\*Tanit Ganz Sanchez<sup>1,2,3</sup>, Fernanda Moraes<sup>2</sup>, Juliana Casseb<sup>2</sup>, Jaci Cota<sup>2</sup>, Katya Freire<sup>3</sup>, & Larry E. Roberts<sup>4</sup>

<sup>1</sup>University of São Paulo School of Medicine, São Paulo, Brazil

<sup>2</sup>Instituto Ganz Sanchez, São Paulo, Brazil

<sup>3</sup>Association of Interdisciplinary Research and Divulcation of Tinnitus, São Paulo, Brazil

<sup>4</sup>Department of Psychology Neuroscience and Behaviour, McMaster University, Hamilton, Ontario, Canada

\*Corresponding Author:

Tanit Ganz Sanchez, MD, PhD

Av. Padre Pereira de Andrade, 353

São Paulo, SP, Brazil – CEP: 05469-000 Phone/fax (+5511) 3021-5251

Author emails: [tanitsanchez@gmail.com](mailto:tanitsanchez@gmail.com); [drafmoraes@gmail.com](mailto:drafmoraes@gmail.com); [jucasseb@yahoo.com.br](mailto:jucasseb@yahoo.com.br); [jacicota@gmail.com](mailto:jacicota@gmail.com); [katya@audicare.com.br](mailto:katya@audicare.com.br); [roberts@mcmaster.ca](mailto:roberts@mcmaster.ca)

Table 1s. Summary of questionnaire. Each main question was answered “yes” or “no”. If “yes”, supplementary questions provided further information<sup>1,2</sup>

**1. Is it hard to hear or understand?**

**2. Have you had tinnitus in the last 12mo, but once/twice/few seconds?**

When or where:

- A. Only at bedtime, less than 50% of the nights
- B. Only at bedtime, more than 50% of the nights
- C. Anytime you are in silence (day or night)
- D. After loud music, but disappears next day
- E. After loud music, and lasts 2-3 days to disappear
- F. In other situations: .....

Ear of tinnitus: (Right, left, both)

Tinnitus sound: (ringing, hissing, other)

Tinnitus affects: (nothing, concentration, sleep, social life)

**3. Are you bothered with sounds that other people are not?**

If yes, which sounds?

- |                 |                     |                   |
|-----------------|---------------------|-------------------|
| A. recess       | E. whistle          | I. people talking |
| B. classroom    | F. cars/motorcycles | J. games          |
| C. Barking dogs | G. radio/TV         | K. Other: .....   |
| D. Phone        | H. music            |                   |

**4. Do you use to hear music with ear phones?**

- Which volume?                    ( ) high            ( ) medium    ( ) low  
 How many hours per day?    ( ) < 1h            ( ) 1-2h        ( ) > 3h  
 How many days per week?    ( ) 1-2d            ( ) 3-4d        ( ) 5-7d

**5. Do you use to go to parties/baladas/shows/raves with loud sounds?**

- How long do you stay?        ( ) < 1h            ( ) 1-2h        ( ) > 3h  
 How many days per week?    ( ) 1-2d            ( ) 3-4d        ( ) > 5d  
 Do you leave them with temporary tinnitus? (yes/no)

**6. Have you been exposed to loud sounds in the last 14h? (yes/no)**

**7. Do you use a mobile phone (except for texting or internet)?**

- How long per day?                ( ) <10min        ( ) 10-30min    ( ) >30min  
 How do you use?                    ( ) speaker        ( ) touching ear ( ) ear phone  
 Which ear do you prefer?        ( ) right            ( ) left            ( ) both

<sup>1</sup> Subjects reporting tinnitus on Question 2 above rated its loudness and annoyance separately on visual analogue scales ranging from 1 (minimal loudness or annoyance) to 10 (maximum loudness and annoyance).

<sup>2</sup> Questions not listed investigated eating habits, otitis, and temporomandibular joint symptoms.
